# Supplementary material
Source: Springer Nature journal article supplement (https://www.springermedizin.de/resource/supplementary/12882_2012_275_MOESM3_ESM.pdf/9453418)
Supplement: MOESM3 [file 9453418]

**Follow-up/Registration Form** (  year(s) after kidney biopsy)

ID:  -

Death:  yes  no If yes, the date of event was : / / (d/m/y )

Renal death:  yes  no If yes, the date of event was : / / (d/m/y)

Cerebro-cardiovascular event:  yes  no If yes, the date of event was : / / (d/m/y)

If yes: dead or  alive

50% decrease in eGFR:  yes  no If yes, the date of event was : / / (d/m/y)

**Follow-up data** The date of sampling (d/m/y):  /  /

Body weight:  kg

Usage of renin-angiotensin-aldosterone system blocker: yes no unknown

Serum creatinine:  mg/dl

Urinary protein as the protein/creatinine ratio (spot urine):  g/gCre

**If the patient data cannot be obtained, please report the reason why.**

stopped visits hospital transfer moved

request to stop the medical consultation others ( )
